# Supplementary material for: Administration of Ligilactobacillus salivarius CECT 30632 to elderly during the COVID-19 pandemic: Nasal and fecal metataxonomic analysis and fatty acid profiling
Source: Front Microbiol. 2022 Dec 16;13:1052675. doi: 10.3389/fmicb.2022.1052675 (PMC9800801; doi:10.3389/fmicb.2022.1052675)
Supplement: Supplementary file 3 [file Table_1.XLSX]

## Sheet: datos residentes
Table S1. Demographic and health-related data of the participants that completed the trial.
			BMI	BMI	tipo alim	tipo alim	Comorbidities	Comorbidities	COVID	COVID	Current medication	Current medication	Barthel	Barthel	GDS	GDS	MNA-SF	MNA-SF
Patient	Gender	Age	Day 0	Day 120	Día 0	Día 120	Day 0	Day 120	Day 0	Day 120	Day 0	Day 120	Day 0	Day 120	Day 0	Day 120	Day 0	Day 120
1	M	94	23.3	23.7	diab/normal	diab/normal	HT/HBP, arthrosis, benign prostatic hyperplasia, diabetes mellitus 2, heart failure	HT/HBP, arthrosis, benign prostatic hyperplasia, diabetes mellitus 2, heart failure	Positive	Negative	calcium, bromazepam, glicazide, macrogol, trramadol/paracetamol	calcium, bromazepam, glicazide, macrogol	30	32	4	4	21.5	24
2	M	86	28.3	27.9	normal	normal	arthrosis, oligophrenia, urinary incontinence, bladder mucocele	arthrosis, oligophrenia, urinary incontinence, bladder mucocele	Positive	Negative	cyanocobalamin, furosemide, lorazepam, tamsulosin	cyanocobalamin, furosemide, tamsulosin	25	25	6	6	20.5	23.5
3	F	86	25	24.7	turmix	turmix	urinary incontinence, presbyopia, moderate cognitive impairement, HT/HBP	urinary incontinence, presbyopia, moderate cognitive impairement, HT/HBP, COVID +	Positive	Negative	acetylsalicylic acid, amlodipine, calcium, cholecalciferol, enalapril, ferrous sulphate, hydrochlorothiazide, lorazepan, omeprazole, sertraline	acetylsalicylic acid, amlodipine, calcium, cholecalciferol, enalapril, hydrochlorothiazide, lorazepan, omeprazole, sertraline	14	14	7	7	18.5	19.5
4	M	81	20.3	20.9	turmix	turmix	HT/HBP, sleeping disorder, Alzheimer, dysphagia, lung and brain cancer, inguinal hernia	HT/HBP, sleeping disorder, Alzheimer, dysphagia, lung and brain cancer, inguinal hernia	Positive	Negative	bromazepam, lisinopril/hydrochlorothiazide, risperidone, sodium hialuronate, trazodone	bromazepam, cyanocobalamin, folic acid, lisinopril/hydrochlorothiazide, risperidone, sodium hialuronate, trazodone	0	0	7	7	13.5	15.5
5	M	94	20.9	21.7	normal	normal	respiratory failure, anxiety, depression	respiratory failure, anxiety, depression	Negative	Negative	gabapentin,lactulose, quetiapine	gabapentin,lactulose, quetiapine	69	69	4	4	18.5	24.3
6	F	74	25.6	24.9	normal	normal	gonarthrosis, Alzheimer, spondylosis, osteoporosis, insomnia, urinary incontinence, bilateral hallus valgus, arthrosis	gonarthrosis, Alzheimer, spondylosis, osteoporosis, insomnia, urinary incontinence, bilateral hallus valgus, arthrosis	Negative	Negative	ascorbic acid, cholecalciferol, quetiapine, rivastigmine	ascorbic acid, cholecalciferol, quetiapine, rivastigmine	52	57	4	4	25.5	26.6
9	F	88	26.2	25.2	normal	normal	irritable bowel syndrome, hipercholesterolemia, urinary incontinence, arthrosis, colonic polyps, constipation, mitral stenosis, parapararesis, scoliosis, arthrosis, spondylitis , herniated disc, HT/HBP, haemorrhoids	irritable bowel syndrome, hipercholesterolemia, urinary incontinence, arthrosis, colonic polyps, constipation, mitral stenosis, parapararesis, scoliosis, arthrosis, spondylitis , herniated disc, HT/HBP, haemorrhoids	Positive	Negative	amlodipine, atorvastatin, cholecalciferol, folic acid, lisinopril/hydrochlorothiazide, sertraline	amlodipine, atorvastatin, captopril, cholecalciferol, folic acid, lisinopril/hydrochlorothiazide, metamizole, sertraline	0	39	2	2	20	24
10	F	87	28.9	28.7	turmix	turmix	HT/HBP, depression, ferropenic anemia, insomnia, moderate cognitive impairement, secondary parkinsonism, hipercholesterolemia, urinary incontinence, keratitis, poliarthritis nodosa	HT/HBP, depression, ferropenic anemia, insomnia, moderate cognitive impairement, secondary parkinsonism, hipercholesterolemia, urinary incontinence, keratitis, poliarthritis nodosa	Positive	Negative	carbidopa/levodopa, enalapril, lorazepam, propanolol, quetiapine, thiamazole	carbidopa/levodopa, enalapril, lorazepam, propanolol, quetiapine, thiamazole	43	48	5	5	18.5	26
11	F	61	19.2	21.4	normal	normal	urinary incontinence, hearing loss (left), D4 paraplegia, constipation, reactive depression, benigh neoplasia in urinary tract, fasciculation, presbyopia	urinary incontinence, hearing loss (left), D4 paraplegia, constipation, reactive depression, benigh neoplasia in urinary tract, fasciculation, presbyopia	Positive	Negative	amlodipine, baclofen, candesartan, cholecalciferol, desvenlafaxine , lormetazepam, macrogol, simvastatin, tiaprice, trazodone,	No data	29	29	1	1	24	24.5
15	M	88	24.9	24.8	turmix	turmix	HT/HBP, auricular fibrilation, Alzheimer, peripheral vertigo, colon polyps, COPD, hypoalbuminemia, heart failure, hemorrhoids	HT/HBP, auricular fibrilation, Alzheimer, peripheral vertigo, colon polyps, COPD, hypoalbuminemia, heart failure, hemorrhoids	Positive	Negative	budesonide, carvedilol, indacaterol/glycopyrronium bromide, ispaghuka husks, quetiapine, telmisartan/hydrochlorothiazide, trazodone	budesonide, carvedilol, indacaterol/glycopyrronium bromide, ispaghuka husks, quetiapine, telmisartan/hydrochlorothiazide, trazodone	26	26	6	6	17.5	19.5
16	M	78	26.4	25.7	diab/normal	diab/normal	diabetes (mellitus 2), hipercholesterolemia, urinary incontinence, herniated disc, cognitive impairement, atopy, cholelitiasis, amnesia, pressure ulcer	diabetes (mellitus 2), hipercholesterolemia, urinary incontinence, herniated disc, cognitive impairement, atopy, cholelitiasis, amnesia, pressure ulcer	Negative	Negative	acetylsalicylic acid, donezepil, insulin, omeprazole, paracetamol, risperidone, simvastatin, tamsulosin, trazodone	acetylsalicylic acid, cyanocobalamin, donezepil, insulin, lactulose, omeprazole, paracetamol, risperidone, simvastatin, tamsulosin, trazodone	87	87	5	5	22.5	24
17	F	85	29.5	24.7	diab/normal	diab/normal	passive/aggresive personality disorder, chronic vulvitis, mild cognitive impairment	passive/aggresive personality disorder, chronic vulvitis, mild cognitive impairment	Positive	Negative	cholecalciferol, lorazepam, metformin, quetiapine	cholecalciferol, lorazepam, metformin, quetiapine	99	99	2	2	23.7	25
18	F	88	31.3	30.3	normal	normal	HT/HBP, arthrosis, obesity, hipercholesterolemia, SINDROME TUNEL CARPIANO, cataract, FX PELVIS, LUMBAGO, VERTIGO PERIFERICO,	HT/HBP, ICC,arthrosis, obesity, hipercholesterolemia, SINDROME TUNEL CARPIANO, cataract, FX PELVIS, LUMBAGO, VERTIGO PERIFERICO, COVID +	Positive	Negative	acetylsalicylic acid, furosemide, macrogol, sertraline, telmisartan	acetylsalicylic acid, furosemide, macrogol, sertraline, telmisartan	22	22	4	4	31.3	26
19	F	84	19.3	20.4	diab/normal	diab/normal	diabetes (mellitus 2), senile dementia, essential tremor, osteoporosis, depression, HT/HBP, urinary incontinence, alopecia, gastric diverticulum	diabetes (mellitus 2), senile dementia, essential tremor, osteoporosis, depression, HT/HBP, urinary incontinence, alopecia, gastric diverticulum			acetylsalicylic acid , amlodipine, cholecalciferol, ferrous sulphate, manidipine, metformin, mirtazapine, omeprazole, venlafaxine		39	45	6	6	16.7	19.3
20	M	89	33.3	31.8	diab/normal	diab/normal	hypothyroidism, gonarthrosis, ischemic cardiopathy, diabetes (mellitus 2), hiatal hernia, HT/HBP, hepatopathy, irritable bowel syndrome, cognitive impairment	hypothyroidism, gonarthrosis, ischemic cardiopathy, diabetes (mellitus 2), hiatal hernia, HT/HBP, hepatopathy, irritable bowel syndrome, cognitive impairment	Positive	Negative	acetylsalicylic acid, calcium, carvedilol, famotidine, furosemide, haloperidol, insulin glorgine, irbesartan, nitroglycerin, rosuvastatin	acetylsalicylic acid, calcium, carvedilol, famotidine, furosemide, haloperidol, insulin glorgine, irbesartan, nitroglycerin, rosuvastatin	96	96	3	3	25.5	25.5
